# Supplementary material for: Home Range, Movement, and Nest Use of Hedgehogs (Erinaceus europaeus) in an Urban Environment Prior to Hibernation
Source: MDPI journal article supplement (doi:10.3390/ani14010130), 2023-12-29
Supplement: s1 [file s1]

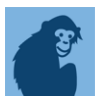

## Supplementary material

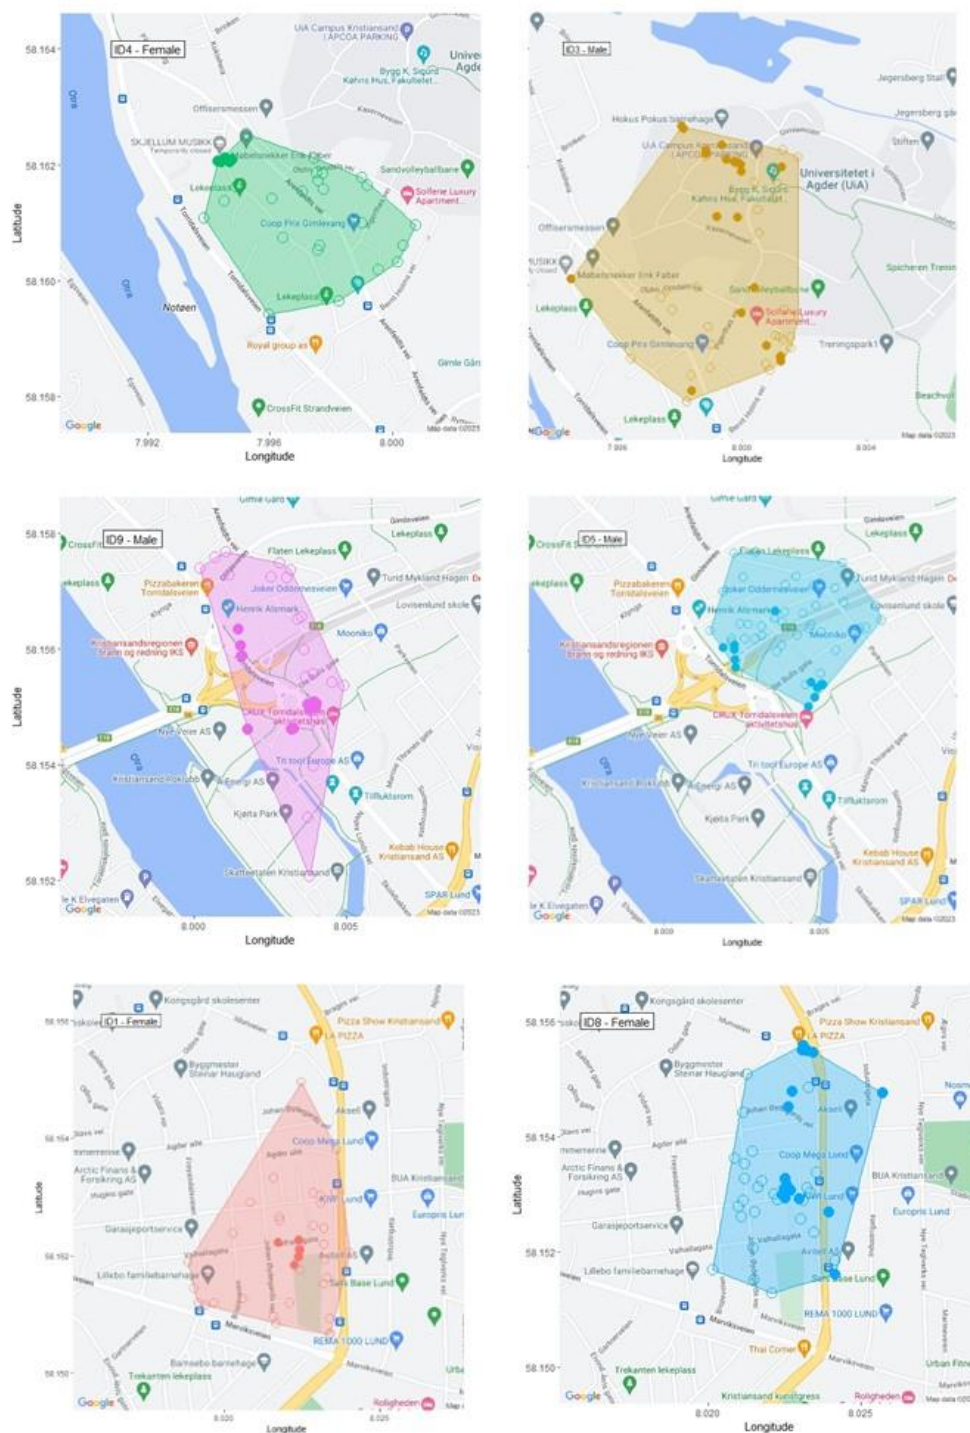

**Figure S1.** 100% MCP home ranges of all six individuals. Open symbols represent localization where the animal was active (during night) and closed symbols represent nest sites. Due to GPS-inaccuracy multiple nest sites positioned close together represent a nest with several localization, but at exactly the same place.

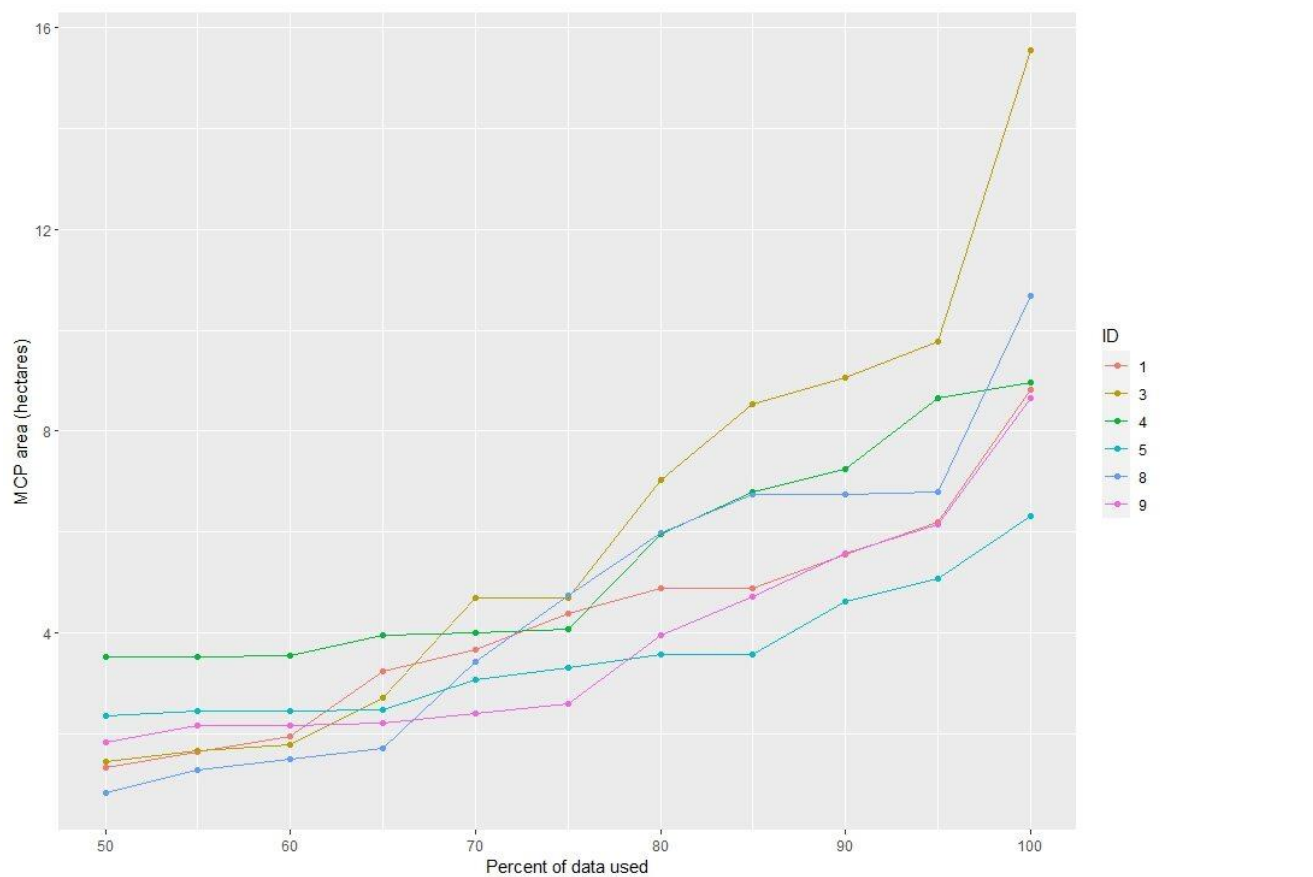

**Figure S2.** Home range asymptote figure, with maximum convex polygon (MCP) area as a function of percentage of data used for each individual hedgehog. The shape of the curves suggest that our home range estimates are underestimated, as the asymptotes still rise at 100% MCPs.
